# Supplementary material
Source: publisher figshare collection journal article supplement (https://karger.figshare.com/ndownloader/files/31579145)
Supplement: Supplementary file 1 [file 31579145]

**ARISES Tools from Previous Studies**

***Stroke dance video and novel stroke video documentary***

Based on findings from previous studies in Nigeria and Ghana, the ARISES PI and some members of the ARISES team developed a stroke dance video and a novel stroke video documentary (titled *‘Combating the African stroke epidemic getting results through synergy’*) for stroke advocacy, training and capacity building. These tools were used in a World Federation of Neurology/THRIVES/SIREN training program, where pre and post-training assessment showed significant improvement in stroke literacy among non-neurologist health workers including those from the proposed ARISES study sites [20,22] . This documentary also has sections which we plan to use for engaging religious leaders, policy makers, healthcare managers and the media in ARISES [23,24].

***The Questionnaire for Verifying Stroke-free Status (QVSFS)***

The QVSFS was developed for stroke screening [25,26]. It is easy to administer as a self-report tool or by an interview in person or by telephone [25–30]. The tool was augmented and validated in SIREN sites. Validation involved translation to the local language, comparing tool findings to medical review and examination by a specialist with a subset of patients undergoing CT scans. The tool showed good sensitivity (0.98), specificity (0.87), negative predictive (0.98) and positive predictive (0.85) value [27,31]. We envisage this tool will enhance the detection of stroke cases by ARISES enumerators

***Validated Stroke Phenotyping Workflow and Software***

The PI of SIREN and ARISES led the development of the novel Annotation and image markup on Clear Canvas Enriched Stroke-phenotyping Software (ACCESS) [32] [30] (Patent # *NG/PT/NC/2016/2007*) for archiving, accurate phenotyping and etiologically classifying stroke (weighted inter-rater kappa 0.8 to 1.0 [18,33–35]. This work package uses REDCap for the management of clinical data including CT/MRIs and Freezerworks® for management of samples in a solar-powered ultra-low temperature biorepository.
